# Supplementary material for: Multifaceted investigation underlies diverse mechanisms contributing to the downregulation of Hedgehog pathway-associated genes INTU and IFT88 in lung adenocarcinoma and uterine corpus endometrial carcinoma
Source: publisher site journal article supplement (doi:10.18632/aging.204262), 2022-09-07
Supplement: Supplementary file [file aging-v14i19-204262-supplementary-material-SD3.pdf]

## SUPPLEMENTARY TABLE

Supplementary Table 2. The promoter sequences of *INTU* and *IFT88*.

---

*INTU* gene promoter sequence (*INTU*<sup>CpG</sup> sequence is in blue and TCF4 binding site is highlighted):

---

ATCATTAATCTGTAATCTATAACCTATGATAGCTCACATTTTAAACTATTACGCTCCAGTTTCTCCATTTATTCTCC  
TTCAGTGGTTCCCCTTACCATTTCTGGCCTGTTCTGACTTAGGGACAGTCTACAGTAGGAAGTCACACACGCGTCA  
CTTTCCACGATGGAAAAACCACCAAGCTAATTTTGTCTTCTTTGACCACAGGCCATAGAATAGTTCACTGA  
AATACCTAATGCCCTAGAGTAGAGACTGTCTCCTGGGGTCAAGTATATTTTAAAGCAAATAAATCCCCCAAAA  
GAGAATAAAGCCACATTAGACAAGTCAGAGTCCACCTTTTATTCACTCTTGTACCTCCAAGGACTAGAACTCGGC  
CTGGCACATAGCAAGTGGTAATACACATTTGCACGGACGGATGAATGTATATGGCTTCTTAGGCTGAATAAA  
ACTCCCACCAAGAGCAGACAACCTTGCCTCTTCCCACCTCGTTTTTCGGGTCTTCCACAGAGCAGCCAGAGCC  
TCAGAGGCCCTTGAGAGTTTCTCCACTCCTCCCTTGTTCAGCGCTAGAAGCTGCAGGTGGTAGTTCCTACAC  
TGGGGCGGGCGCTGGACGCGGGTGTCCCTGGCCAAGGCGGCCTCGCTGTCCTGGAAGGGAGGGTGAAGAGCT  
GCATCCCGCACTAGGCGGGCAAAGAGGGCAGCGCCAAGCGGGGGGTCCGGAGGCGCTCGACGGCTCGCGCCC  
AGCGCCGGAGACGGGCTGTGTGTTGGGCCAGTGGAAGACACCGGAGAAACCCAGACGTGGAAGACCGGGCAGC  
CTGGACTTCGCGAGCCCTGGTGGGGCTGGCGGCCACAGAGCCCCACCTGCCCGAGCTCCACAGCGAGGAG  
TGGCCGCGCCGCCAGTGCGCCGGGCTCCGAGACCGGCAGGGGAGCACGCGGGCGAAGGAGGGGGCCGCGC  
TCGCTGACACCACCGCCTTACGCCCTTGGCTTCCGCGCGTCCGAGGCTGGCACCTCCAGGTTACCCGCGGGCC  
GGAGCTGTGCGGGGCCAGACGGTTCGGCGGGAGCCGGGGTGGGACCTGGGTGACCTGTCTCGTCCGCCCTGTA  
GCGAGTCTCAGTGGGCATGTTTCAGGTGGGCAGGTCCAGCATCCCCAAACCTGCCCGCCGAGCCTGGAGGAC  
CTGGACTCAGTGCAGCGTGTCTGTACACAG.

---

*IFT88* gene promoter sequence (*IFT88*<sup>CpG</sup> sequence is in blue and TCF4 binding site is highlighted):

---

GCTGGTCTCCAACCTCCTCACCTCAGGTGATCCGCCAGCCTCAGCCTCCCAAAGTGCTGGGATTATAGGCATGAGC  
CACTGCGCCCGCCAACACTACTTATTTTATAAAAACCTCATTAACTAGGTGTCTTTAGACTCCCTCTGTCCCTC  
CCCTCCATCCCCAACATTTACTTTTAAAAATTAAGACAAAACCTTAAACATTAACAATTATGAATTTAATTCCCC  
ATTTATATTACATTGATTAAGCTTTACACTATGACCCAGGTTCTAGGTGGTTGGGACACAATGGTTCAATCCCTGT  
CTAGTAAATAAAACGACACCTTAAGCGCTACAATCAAGGTGCGCACGGGGTGTACAGAACAATACGCAGAC  
AGGAGGAGGTGGGGGAAAGGTGAGACTTCCCAGGCAGGTGTCATCCCAGAATAACTTTTACACAGGGTGACT  
AAGCGAGTTAGTGACTGCGCGGAAAACGGGCTTCCAAGGTTACAAGGCTCGTGCTGCGGCTCCGGGAGTTATG  
TCACAGTAAGCTTACTATCATCCTTTGGGCATCTGCTTTACGGATGAGTTCATCAGGATTTAAAGGATCTTGGTTC  
CATATCCTTCCCCTTCCCTCACAGAGGCCGCCAGCCCGGAGCCCCTCTAGGCCCTCCTCCCTCCTGCATCTACTGGC  
CGCGAGCCTTTCCCTCCCCGCCCCCTTACACAGGCCCGCCCCAGCCTCCCAACCCCCCGGTTCCGTTCCACGGG  
AGGCCCGGCCTCCCTGCCCTCTCTCCACCGTTCTACCCGCATCGCCGGCTTCCCGCAAGCCGCTGGCACCGT  
CCCCTCAACACCCTCCGCCACCGCCACTCCCTTCCACTGAGGGGGACCGGGCTGCCTTCTCTCTGACCCGCGCT  
TCTCCGCCCCACCCACTTCCCCAGGCCTCCCGCACCACCCCTTCCCGCCGCGCTCTCTCCGCCCCCGCGCTTC  
CGCCCCCGCCCCCGCGGAGGACTGTGGGAGCGGCTTCCCTTGATTCCGCGCTTGGCAACCGGCTCGCG  
TCGCGCTTTGGCCAACCGCTGCGTGTCTCCCTGGGCCGAATAACTGTGCGCCGCTTCCCTCAGCGTGAG.

---
