# Supplementary material for: Multifaceted investigation underlies diverse mechanisms contributing to the downregulation of Hedgehog pathway-associated genes INTU and IFT88 in lung adenocarcinoma and uterine corpus endometrial carcinoma
Source: Aging (Albany NY). 2022 Sep 7;14(19):7794–823. doi: 10.18632/aging.204262 (PMC9596204; doi:10.18632/aging.204262)
Supplement: Supplementary Table 1 [file aging-14-204262-s002.xlsx]

## Sheet: LUAD_INTU
Supplementary Table 1. The top 100 genes with similar expression patterns as INTU from LUAD and UCEC tumor samples.
Gene Symbol	Gene ID	PCC
CFAP44	ENSG00000206530.8	0.61
WDR19	ENSG00000157796.17	0.6
KIAA1407	ENSG00000163617.10	0.59
CFAP69	ENSG00000105792.19	0.58
STK36	ENSG00000163482.11	0.58
TTC21A	ENSG00000168026.16	0.58
RABL2A	ENSG00000144134.18	0.56
UBXN11	ENSG00000158062.20	0.56
TTLL3	ENSG00000214021.15	0.54
CEP83	ENSG00000173588.14	0.54
DZIP3	ENSG00000198919.12	0.54
EFHC1	ENSG00000096093.14	0.54
CTD-2047H16.4	ENSG00000263069.5	0.54
RBM5	ENSG00000003756.16	0.54
XX-C00717C00720L.1	ENSG00000279182.1	0.53
STK11IP	ENSG00000144589.20	0.53
ASB14	ENSG00000239388.8	0.53
SPEF2	ENSG00000152582.12	0.53
BBS5	ENSG00000163093.11	0.52
CEP162	ENSG00000135315.11	0.52
CFAP70	ENSG00000156042.17	0.52
WDR27	ENSG00000184465.15	0.52
ACAD11	ENSG00000240303.7	0.51
CCDC40	ENSG00000141519.14	0.51
MKS1	ENSG00000011143.16	0.51
NKTR	ENSG00000114857.17	0.51
NOXRED1	ENSG00000165555.9	0.51
LRGUK	ENSG00000155530.2	0.51
RP11-368I7.6	ENSG00000275734.1	0.51
CCDC146	ENSG00000135205.14	0.51
RP11-458F8.4	ENSG00000273142.1	0.51
C21orf58	ENSG00000160298.17	0.5
RABL2B	ENSG00000079974.17	0.5
NPHP3	ENSG00000113971.18	0.5
RP11-1376P16.2	ENSG00000265678.1	0.5
DNAH1	ENSG00000114841.17	0.5
AGBL2	ENSG00000165923.15	0.5
RP11-23J9.4	ENSG00000255036.5	0.5
NISCH	ENSG00000010322.15	0.5
WDR90	ENSG00000161996.17	0.5
GOLGA2P5	ENSG00000238105.7	0.5
DMTF1	ENSG00000135164.18	0.5
RP11-444E17.6	ENSG00000272442.2	0.5
HERC2P2	ENSG00000276550.4	0.5
CCDC180	ENSG00000197816.13	0.49
ANAPC4	ENSG00000053900.10	0.49
IFT88	ENSG00000032742.17	0.49
NPHP4	ENSG00000131697.17	0.49
CLHC1	ENSG00000162994.15	0.49
KIAA0556	ENSG00000047578.12	0.49
RBM6	ENSG00000004534.14	0.49
LINC01002	ENSG00000282508.1	0.49
CEP126	ENSG00000110318.13	0.49
RP3-329A5.8	ENSG00000272374.1	0.49
DZANK1	ENSG00000089091.16	0.49
ANKZF1	ENSG00000163516.13	0.49
LINC00265	ENSG00000188185.11	0.49
DFNB31	ENSG00000095397.13	0.49
CCDC66	ENSG00000180376.16	0.49
GPR135	ENSG00000181619.11	0.49
RPL32P3	ENSG00000251474.6	0.48
ANKMY1	ENSG00000144504.15	0.48
ZNF621	ENSG00000172888.11	0.48
TBC1D32	ENSG00000146350.13	0.48
PNISR	ENSG00000132424.14	0.48
GOLGA8B	ENSG00000215252.11	0.48
RP11-384K6.6	ENSG00000260404.2	0.48
CTD-2013N24.2	ENSG00000244513.6	0.48
RP5-1165K10.2	ENSG00000273432.1	0.48
AHSA2	ENSG00000173209.22	0.48
RPL5P30	ENSG00000243431.1	0.48
MAATS1	ENSG00000183833.16	0.48
NPTN-IT1	ENSG00000281183.1	0.47
QRICH1	ENSG00000198218.10	0.47
DLEU2L	ENSG00000116652.6	0.47
KIF27	ENSG00000165115.14	0.47
AC005154.6	ENSG00000196295.11	0.47
NPIPA1	ENSG00000183426.15	0.47
RP11-164P12.3	ENSG00000251455.1	0.47
CNTRL	ENSG00000119397.16	0.47
CCDC114	ENSG00000105479.15	0.47
SLC25A14	ENSG00000102078.15	0.47
CEP290	ENSG00000198707.14	0.47
RP11-300G22.2	ENSG00000259561.1	0.47
LLNLF-176F2.1	ENSG00000282339.1	0.47
ODF2L	ENSG00000122417.15	0.47
LINC01001	ENSG00000230724.9	0.47
KIAA0895L	ENSG00000196123.12	0.47
MYCBPAP	ENSG00000136449.13	0.47
CTB-50L17.8	ENSG00000280239.1	0.47
ARMC2	ENSG00000118690.12	0.47
CSAD	ENSG00000139631.18	0.47
FBXL2	ENSG00000153558.13	0.47
SUPT7L	ENSG00000119760.15	0.47
CROCC	ENSG00000058453.16	0.46
C20orf96	ENSG00000196476.11	0.46
RP11-263K19.4	ENSG00000231064.5	0.46
STAG3L5P-PVRIG2P-PILRB	ENSG00000272752.5	0.46
RP11-264B17.3	ENSG00000261067.6	0.46
PAXBP1	ENSG00000159086.14	0.46

## Sheet: UCEC_INTU
Gene Symbol	Gene ID	PCC
KIAA1407	ENSG00000163617.10	0.82
SPEF2	ENSG00000152582.12	0.81
MDH1B	ENSG00000138400.12	0.8
IFT88	ENSG00000032742.17	0.77
NEK5	ENSG00000197168.11	0.77
DCDC1	ENSG00000170959.14	0.77
CC2D2A	ENSG00000048342.15	0.76
WDR19	ENSG00000157796.17	0.76
TSNAXIP1	ENSG00000102904.14	0.76
RABL2B	ENSG00000079974.17	0.75
CCDC176	ENSG00000119636.15	0.75
CCDC108	ENSG00000181378.13	0.75
PIH1D2	ENSG00000150773.10	0.75
TTLL9	ENSG00000131044.16	0.75
NME5	ENSG00000112981.4	0.75
C22orf23	ENSG00000128346.10	0.74
DNAH7	ENSG00000118997.13	0.74
IFT140	ENSG00000187535.13	0.74
TTC23L	ENSG00000205838.12	0.74
C9orf117	ENSG00000160401.14	0.74
RP11-444E17.6	ENSG00000272442.2	0.74
LRRC74B	ENSG00000187905.10	0.73
RP11-368I7.6	ENSG00000275734.1	0.73
DZIP3	ENSG00000198919.12	0.73
TEX9	ENSG00000151575.14	0.73
RP11-787I22.3	ENSG00000271730.1	0.73
AK9	ENSG00000155085.15	0.73
CFAP221	ENSG00000163075.12	0.73
AGBL2	ENSG00000165923.15	0.73
NME9	ENSG00000181322.13	0.73
RAB36	ENSG00000100228.12	0.73
DLEC1	ENSG00000008226.19	0.72
CFAP70	ENSG00000156042.17	0.72
TTC25	ENSG00000204815.8	0.72
FAM47E	ENSG00000189157.13	0.72
CEP126	ENSG00000110318.13	0.72
CCDC113	ENSG00000103021.9	0.72
EFHC1	ENSG00000096093.14	0.72
LRGUK	ENSG00000155530.2	0.72
CDK20	ENSG00000156345.17	0.71
CEP83	ENSG00000173588.14	0.71
CFAP69	ENSG00000105792.19	0.71
CCDC114	ENSG00000105479.15	0.71
FAM227A	ENSG00000184949.15	0.71
CFAP57	ENSG00000243710.7	0.71
CFAP43	ENSG00000197748.12	0.71
FANK1	ENSG00000203780.10	0.71
LRRC43	ENSG00000158113.12	0.71
BBS5	ENSG00000163093.11	0.71
HYDIN	ENSG00000157423.17	0.71
NPHP1	ENSG00000144061.12	0.71
WDR93	ENSG00000140527.14	0.71
CFAP99	ENSG00000249428.5	0.71
DNAH10	ENSG00000197653.14	0.71
RSPH14	ENSG00000100218.11	0.71
RFX3	ENSG00000080298.15	0.71
MAATS1	ENSG00000183833.16	0.71
CCDC30	ENSG00000186409.14	0.71
RP11-203H19.2	ENSG00000279328.1	0.7
NOXRED1	ENSG00000165555.9	0.7
ZBBX	ENSG00000169064.12	0.7
CFAP61	ENSG00000089101.17	0.7
STK33	ENSG00000130413.15	0.7
TMEM231	ENSG00000205084.10	0.7
CCDC173	ENSG00000154479.12	0.7
ARMC2	ENSG00000118690.12	0.7
RP11-57H12.3	ENSG00000226026.5	0.7
RP11-48G14.3	ENSG00000277245.1	0.7
LCA5L	ENSG00000157578.13	0.7
ANKMY1	ENSG00000144504.15	0.7
RP11-193M21.1	ENSG00000269916.1	0.7
DUSP19	ENSG00000162999.12	0.7
DYNC2H1	ENSG00000187240.13	0.7
RP11-23J9.4	ENSG00000255036.5	0.7
DNAI1	ENSG00000122735.15	0.7
CROCC2	ENSG00000226321.5	0.7
TMEM232	ENSG00000186952.14	0.7
FBXO36	ENSG00000153832.11	0.7
TTC41P	ENSG00000214198.7	0.7
CCDC40	ENSG00000141519.14	0.69
EFCAB6	ENSG00000186976.14	0.69
FAM179A	ENSG00000189350.12	0.69
ZNF19	ENSG00000157429.15	0.69
PACRG	ENSG00000112530.11	0.69
VWA3A	ENSG00000175267.14	0.69
DYX1C1	ENSG00000256061.7	0.69
C17orf97	ENSG00000187624.8	0.69
RP11-424M24.5	ENSG00000262890.1	0.69
CCDC33	ENSG00000140481.13	0.69
WDR78	ENSG00000152763.16	0.69
GAS2L2	ENSG00000270765.5	0.69
RP11-253M7.1	ENSG00000259426.5	0.69
SPAG8	ENSG00000137098.13	0.69
MAP3K19	ENSG00000176601.11	0.69
STPG1	ENSG00000001460.17	0.69
CDHR3	ENSG00000128536.15	0.69
C22orf15	ENSG00000169314.14	0.69
GLB1L	ENSG00000163521.15	0.69
CAPS2	ENSG00000180881.19	0.69
CASC2	ENSG00000177640.15	0.68
